# Supplementary material for: Effect of Aluminum Incorporation into Mesoporous Aluminosilicate Framework on Drug Release Kinetics
Source: Hindawi journal article supplement (doi:10.1155/2017/9864396), 2017-01-01
Supplement: f1 [file 9864396.f1.docx]

Supplementary Information

Effect of aluminum incorporation into mesoporous aluminosilicate framework on drug release kinetics

Raul - Augustin MITRAN1, Daniela BERGER2, Jeanina PANDELE-CUSU1, Cristian MATEI2*

1 “Ilie Murgulescu” Institute of Physical Chemistry, Romanian Academy, 202 Splaiul Indepedentei, Bucharest, 060021, Romania

2 University "Politehnica" of Bucharest, Faculty of Applied Chemistry and Material Science, 1-7 Polizu street, Bucharest, 011061, Romania

In order to compare the drug release from Al-containing MCM—41 and SBA-15-type supports, the cumulative drug release was normalized to the Al weight fraction in the materials (Fig. S1). The normalized release rate is faster for AlSBA-15 than for AlMCM-41.





Fig. S1. Normalized drug release to Al content

Table S1. Comparison between the textural properties of commercial AlMCM-41 used in this study with the properties of MCM-41 obtained using C14TAB or C16TAB

| Sample | SBET (m2g-1) | dBJH (nm) | Vpore  (cm3g-1) | Synthesis method |
| --- | --- | --- | --- | --- |
| MCM-41 | 775 | 2.4 | 0.61 | This study, with C14TAB |
| AlMCM-41 | 1000 | 2.6 | 0.75 | Commercially available |
| MCM-41 | 959 | 3.0 | 0.91 | [1], with C16TAB |
